# Supplementary figures and images for: Notch signalling regulates the contribution of progenitor cells from the chick Hensen's node to the floor plate and notochord
Source: Oxford University Press journal article supplement (doi:10.1242/dev.041608), 2010-01-28

*cHairy2*

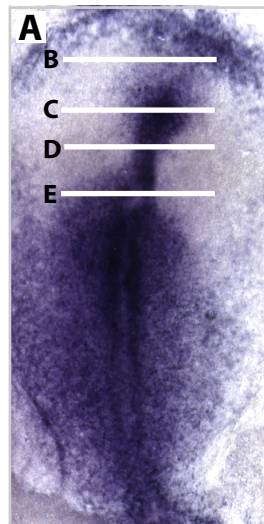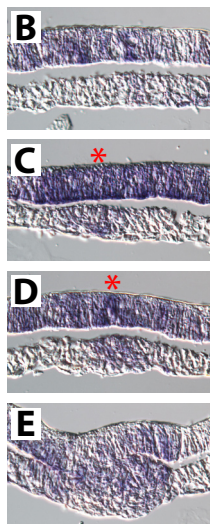

*cFoxa2*

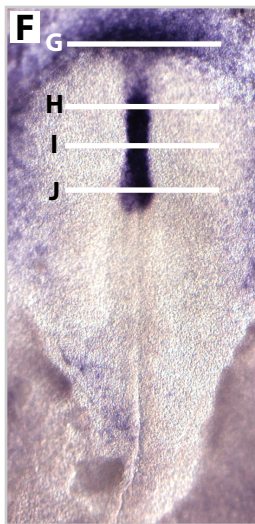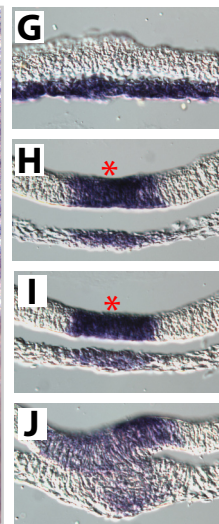

*cHairy2*

DMSO

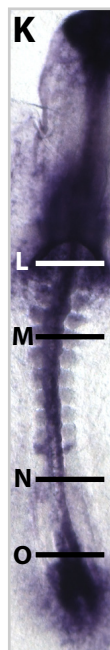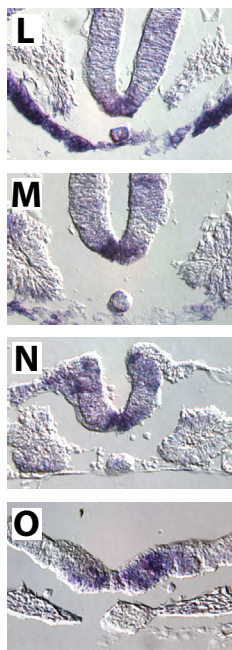

DAPT

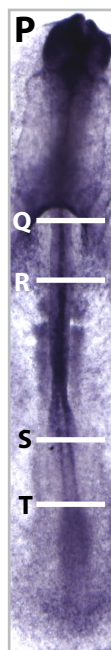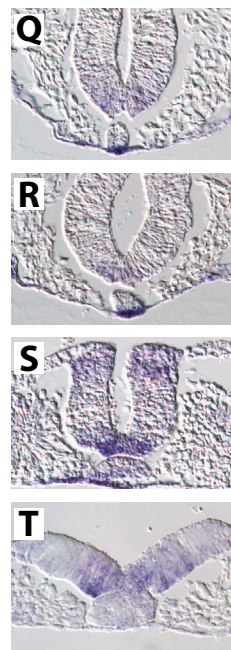

DAPT (supplemented)

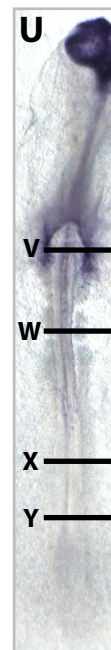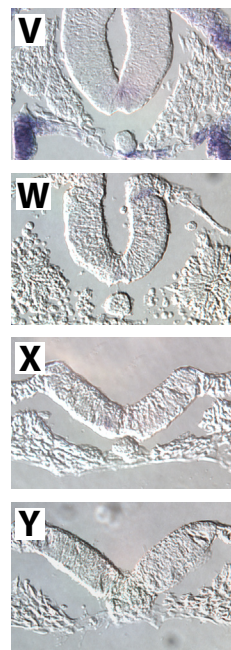

Supplement: dev041608-sup-041608figs1.pdf [file dev041608-sup-041608figs1.pdf]

## Medial Sector of Node Treated with DAPT

**A**

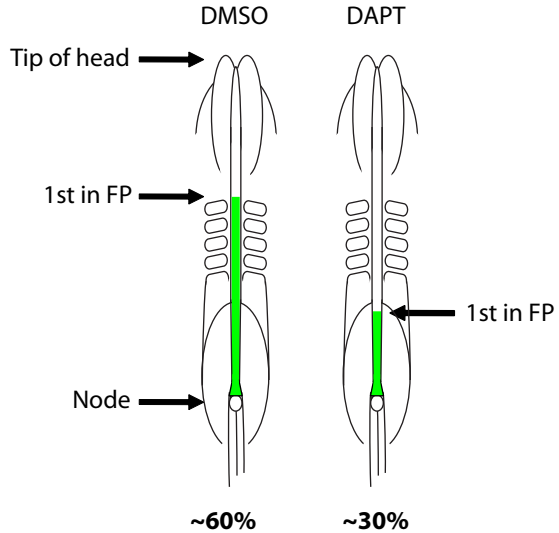

## Entire Host Embryo Treated with DAPT

**B**

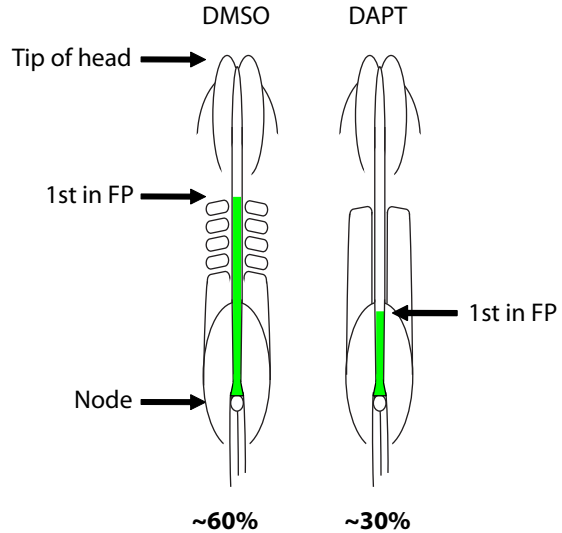

Supplement: dev041608-sup-041608figs2.pdf [file dev041608-sup-041608figs2.pdf]
